# Supplementary material for: SORBS1 serves a metastatic role via suppression of AHNAK in colorectal cancer cell lines
Source: PubMed Central journal article supplement — Int J Oncol. 2020 Mar 5;56(5):1140–51. doi: 10.3892/ijo.2020.5006 (PMC7115741; doi:10.3892/ijo.2020.5006), 2020-03-05

Figure S1. 5-Fu sensitivity of HCT-116 and SNU-C4 shSORBS1 cells. Sensitivity of (A) HCT-116 and (B) SNU-C4 cells to 5-Fu was measured. Cells were incubated with 5-Fu for 72 h and cell viability was measured using the WST-1 assay. 5-Fu, 5-fluorouracil; sh, short hairpin RNA; SORBS1, sorbin and SH3 domain containing 1.

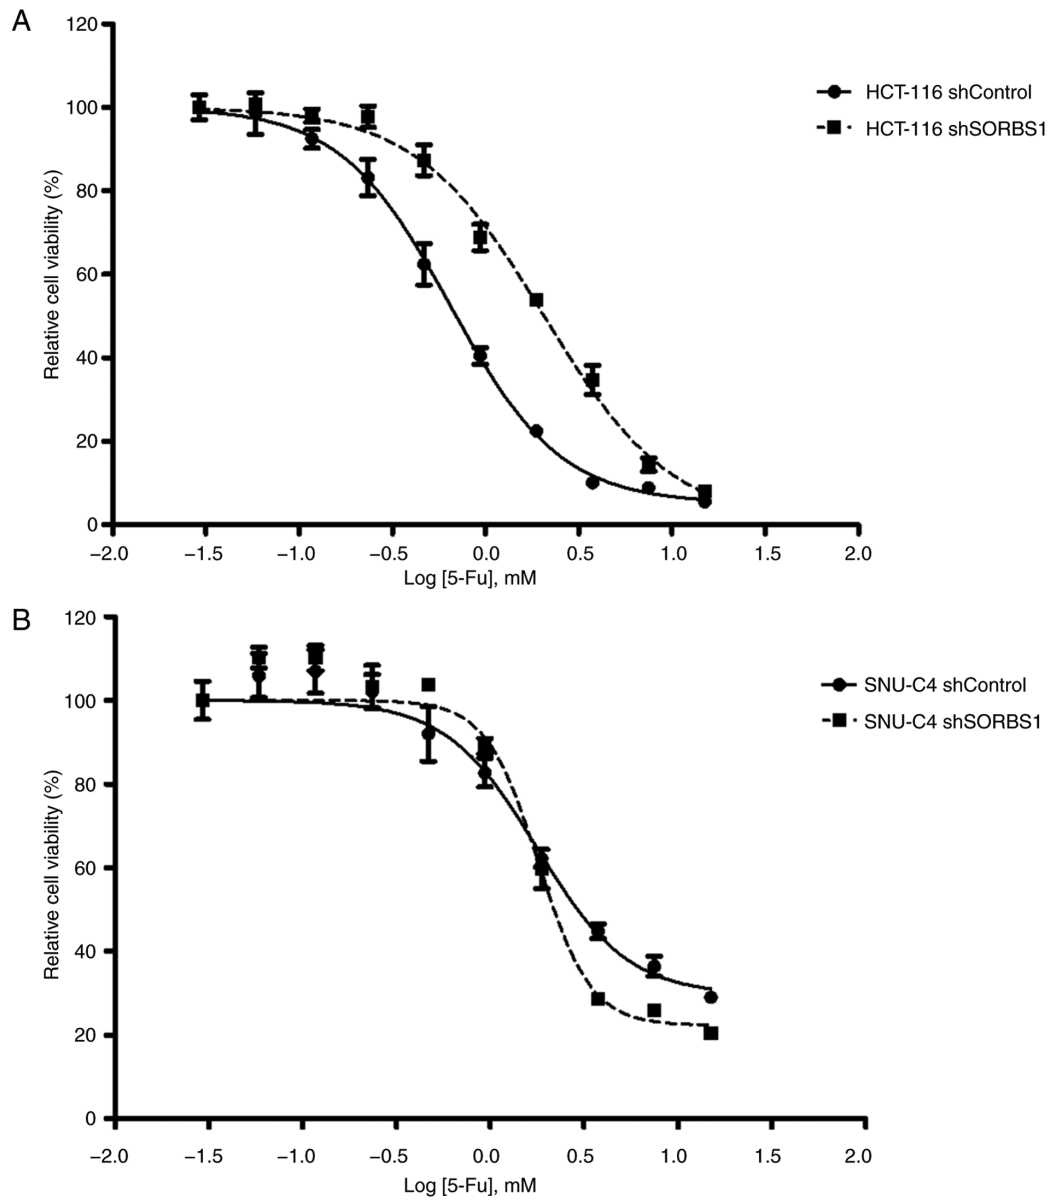

Figure S2. Co-IP of SORBS1 and AHNAK. The SORBS1-AHNAK complex was identified by co-IP using antibodies targeting SORBS1 and AHNAK. (A) IP: SORBS1; upper band, heavy chain; lower band, AHNAK. (B) IP: AHNAK; upper band, SORBS1; lower band, heavy chain. AHNAK, AHNAK nucleoprotein; IP, immunoprecipitation; SORBS1, sorbin and SH3 domain containing 1.

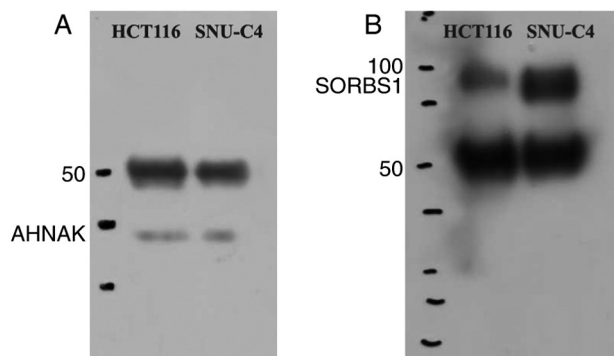

Supplement: Supplementary_Data.pdf [file Supplementary_Data.pdf]
